# Supplementary material for: Polyamine-induced modulation of genes involved in ethylene biosynthesis and signalling pathways and nitric oxide production during olive mature fruit abscission
Source: PubMed Central journal article supplement — J Exp Bot. 2011 Jun 1;62(13):4447–65. doi: 10.1093/jxb/err124 (PMC3170544; doi:10.1093/jxb/err124), 2011-06-01
Supplement: supp_err124_00058891-file003.pdf [file supp_err124_00058891-file003.pdf]

**Polyamine-induced modulation of genes involved in ethylene biosynthesis and signalling pathways and nitric oxide production during olive mature fruit abscission**  
Maria C. Parra-Lobato and Maria C. Gomez-Jimenez.

## **Supplementary Figures**

**Supplementary Fig. S1.** Phylogenetic analysis of *OeACS* and other ACSs. Gene accession number is shown in parentheses of each gene. The phylogenetic tree was computed using the Clustal-W program (Thompson *et al.*, 1994) employing standard parameters.

**Supplementary Fig. S2.** Phylogenetic analysis of *OeACO* and other ACOs. Gene accession number is shown in parentheses of each gene. The phylogenetic tree was computed using the Clustal-W program (Thompson *et al.*, 1994) employing standard parameters.

**Supplementary Fig. S3.** Phylogenetic analysis of *OeERS* and other ERSs. Gene accession number is shown in parentheses of each gene. The phylogenetic tree was computed using the Clustal-W program (Thompson *et al.*, 1994) employing standard parameters.

**Supplementary Fig. S4.** Phylogenetic analysis of *OeCTR* and other CTRs. Gene accession number is shown in parentheses of each gene. The phylogenetic tree was computed using the Clustal-W program (Thompson *et al.*, 1994) employing standard parameters.

**Supplementary Fig. S5.** Phylogenetic analysis of *OeEIL* and other EILs. Gene accession number is shown in parentheses of each gene. The phylogenetic tree was computed using the Clustal-W program (Thompson *et al.*, 1994) employing standard parameters.

**Supplementary Fig. S6.** z-Animated 3-D reconstruction of CLSM detection of NO in ARB fruit AZ at 217 DPA with DAF-FM-DA.

**Supplementary Fig. S7.** z-Animated 3-D reconstruction of CLSM detection of NO in PIC fruit AZ at 217 DPA with DAF-FM-DA.

**Fig. S1**

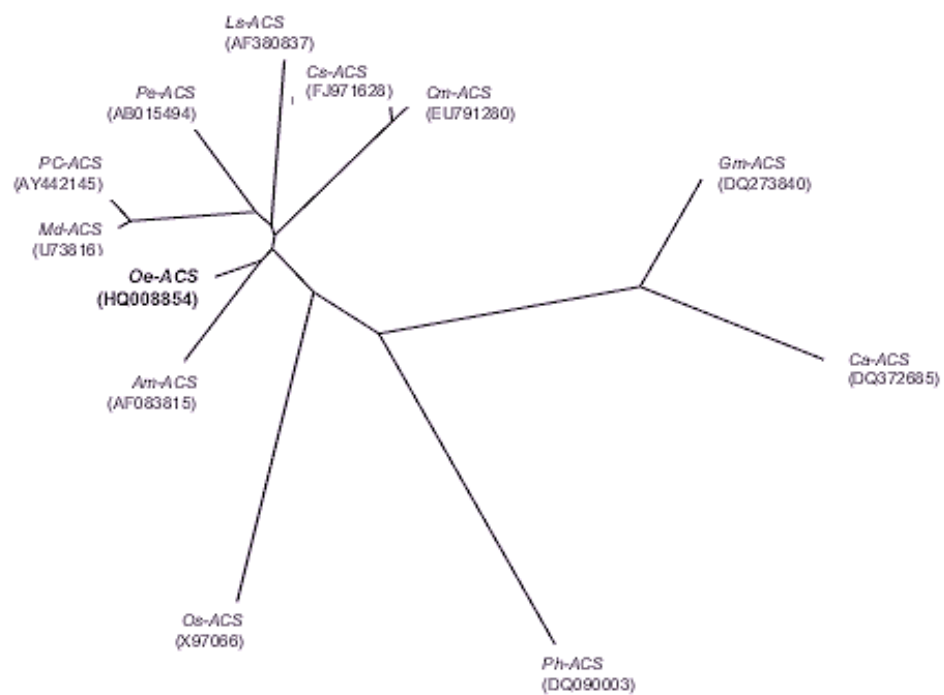

0.1

**Fig. S2**

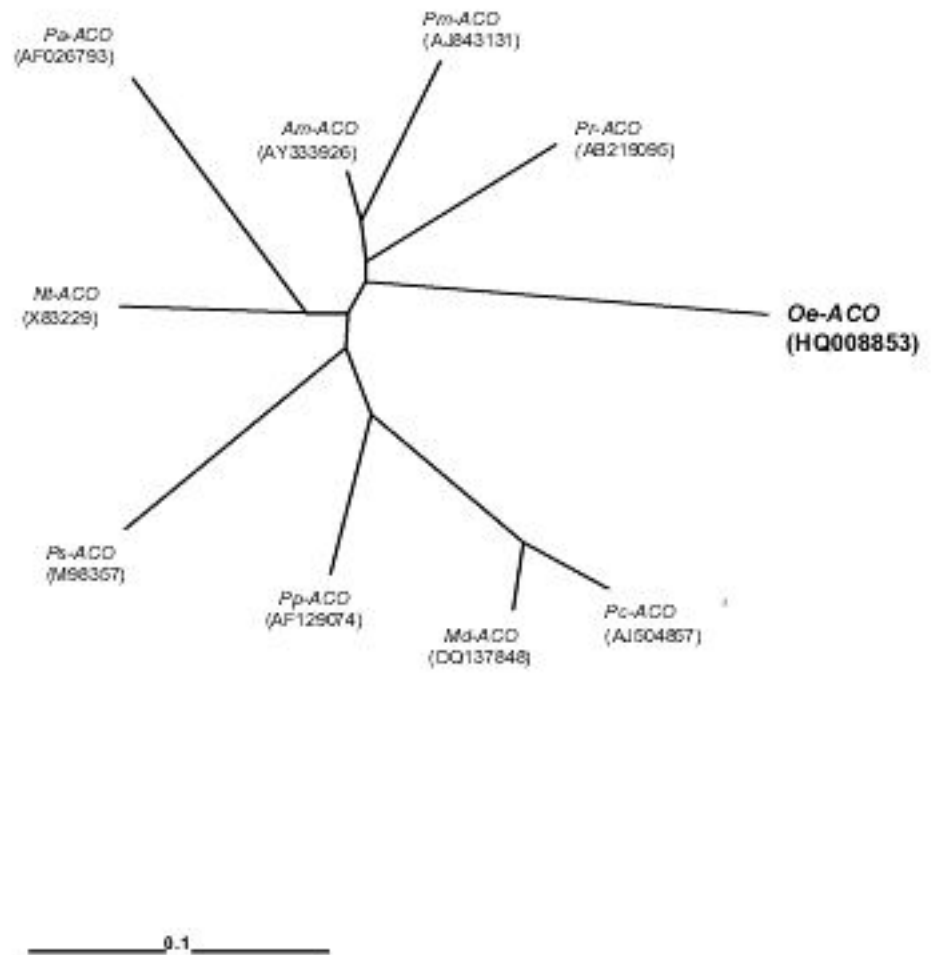

Fig. S3

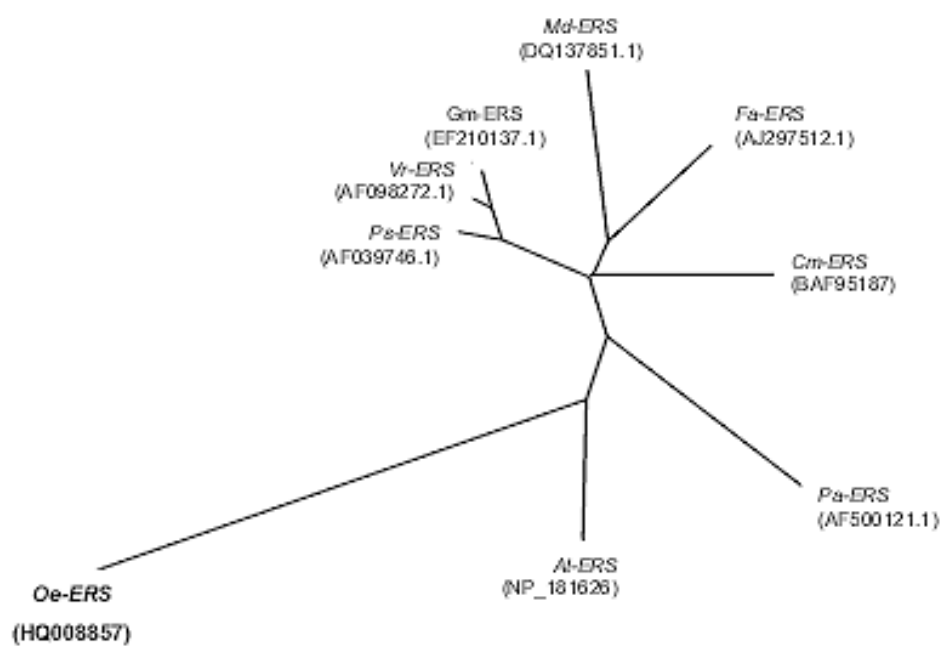

0.1

**Fig. S4**

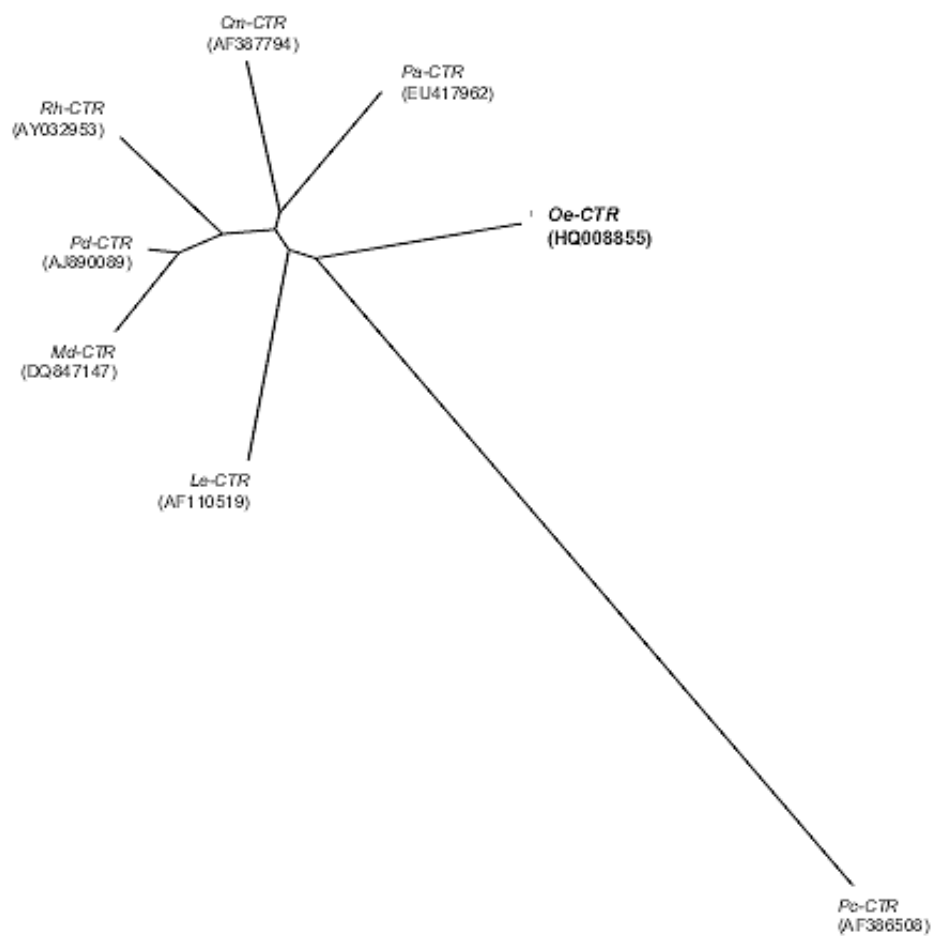

0.1

**Fig. S5**

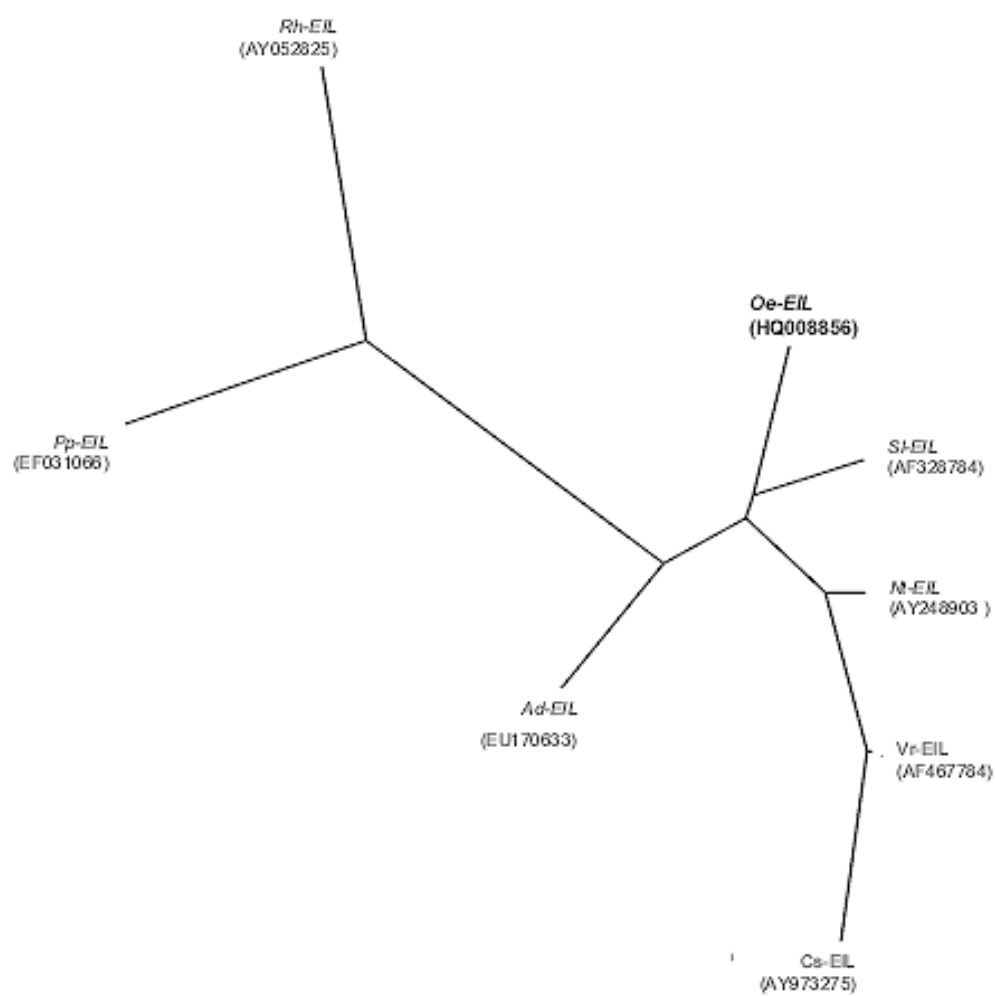

0.1
